# Supplementary figures and images for: Open-source sensor for measuring oxygen partial pressures below 100 microbars
Source: PLOS journal article supplement (doi:10.1371/journal.pone.0206678), 2018-11-14

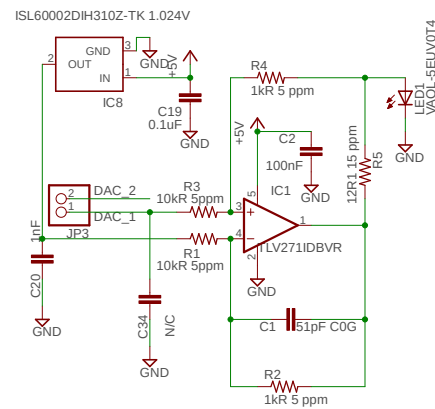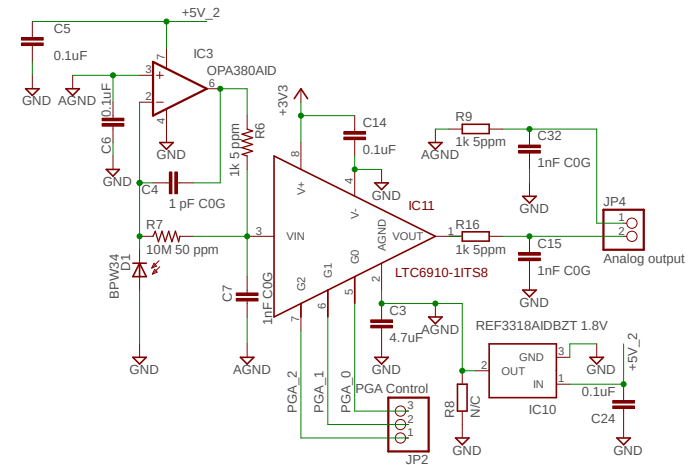

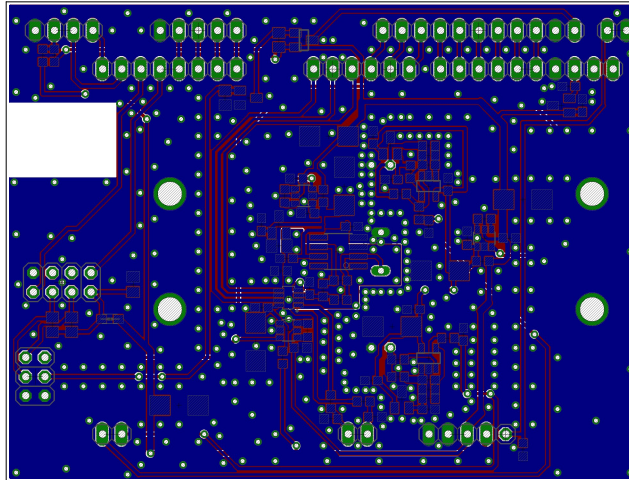

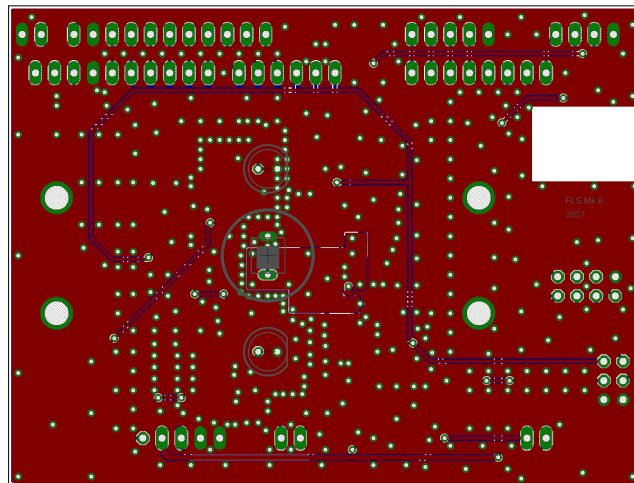

Supplement: S2 (10.1371/journal.pone.0206678.s002) [file journal.pone.0206678.s002]
